# Supplementary material
Source: publisher site journal article supplement (https://www.dovepress.com/article/398951)
Supplement: Supplementary file 1 [file get_supplementary_file.php]

Supplementary Tables:

Supplementary Table 1: CLSI interpretation ranges for the selected antibiotics.

| Antibiotic class | Drug | Abbreviation | Disc content | Interpretation criteria (mm) | | |
| --- | --- | --- | --- | --- | --- | --- |
| (µg) | Susceptible | Intermediate | Resistant |
| Penicillin (Broad spectrum) | Amoxicillin + Clavulanic Acid | AMC | 30 (20/10) | ≥18 | 14-17 | ≤13 |
| Tetracyclines | Tetracycline | TE | 30 | ≥15 | 12-14 | ≤11 |
| Antifolate | Sulfamethoxazole + Trimethoprim | SXT | 25 (23.75/1.25) | ≥16 | 11-15 | ≤10 |
| Aminoglycoside | Gentamicin | CN | 30 | ≥15 | 13-14 | ≤12 |
| Fluoroquinolone (2nd Gen) | Ciprofloxacin | CIP | 5 | ≥26 | 22-25 | ≤21 |
| Cephalosporins |  |  |  |  |  |  |
| 3rd Gen | Cefotaxime | CTX | 30 | ≥26 | 23-25 | ≤22 |
| 3rd Gen | Ceftazidime | CAZ | 30 | ≥21 | 18-20 | ≤17 |
| 4th Gen | Cefepime | FEP | 10 | ≥25 | 19-24 | ≤18 |
| Monobactam | Aztreonam | ATM | 30 | ≥21 | 18-20 | ≤17 |
| Carbapenems | Imipenem | IPM | 10 | ≥23 | 20-22 | ≤19 |
|  | Meropenem | MEM | 10 | ≥23 | 20-22 | ≤19 |

CLSI-The Clinical and Laboratory Standards Institute; Performance standards for antimicrobial susceptibility testing 31st edition. CLSI supplement M100. Clinical and Laboratory Standards Institute. 2021

Supplementary Table 2: Resistance profiles of ESBL-EC isolates

| Resistance to drugs | Frequency = % | Resistance profile |
| --- | --- | --- |
| R3 | 1 | CTX,FEP,TE |
|  | 1 | SXT,CTX,FEP |
|  | 1 | SX,TE,CIP |
|  | 1 | SXT,CXT,TE |
|  | 1 | SXT,TE,ATM |
| R4 | 1 | SXT,CTX,FEP,CAZ |
|  | 1 | SXT,CTX,FEP,CIP |
|  | 1 | CTX,FEP,TE,CIP |
|  | 1 | SXT,CTX,FEP,CN |
|  | 1 | SXT,ATM,CAZ,CIP |
|  | 1 | SXT,CTX,FEP,ATM |
|  | 1 | CTX,FEP,TE,ATM |
| R5 | 3 | CTX,FEP,ATM,CAZ,CIP |
|  | 1 | AMC,SXT,CTX,CAZ,CIP |
|  | 3 | SXT,CTX,FEP,TE,ATM |
|  | 2 | SXT,CTX,FEP,TE,CAZ |
| R6 | 9 | SXT,CTX,FEP,TE,ATM,CAZ |
|  | 1 | SXT,CTX,FEP,TE,ATM,CAZ, |
|  | 1 | CTX,FEP,TE,ATM,CAZ,CIP |
|  | 1 | SXT,CTX,FEP,TE,CAZ,CIP |
|  | 2 | AMC,SXT,CTX,FEP,ATM,CAZ |
|  | 2 | AMC,CTX,FEP,TE,ATM,CAZ |
|  | 1 | SXT,MEM,TE,ATM,CAZ,CIP |
|  | 1 | AMC,CTX,FEP,ATM,CAZ,CIP |
|  | 1 | SXT,CTX,FEP,TE,ATM,CIP |
|  | 1 | AMC,CN,TE,ATM,CAZ,CIP |
| R7 | 5 | AMC,CTX,FEP,TE,ATM,CAZ,CIP |
|  | 3 | AMC,SXT,CTX,FEP,ATM,CAZ,CIP |
|  | 1 | SXT,CTX,FEP,MEM,TE,ATM,CAZ |
|  | 2 | AMC,SXT,CTX,FEP,TE,ATM,CAZ |
|  | 10 | SXT,CTX,FEP,TE,ATM,CAZ,CIP |
| R8 | 13 | AMC,SXT,CTX,FEP,TE,ATM,CAZ,CIP |
|  | 2 | AMC,SXT,CTX,FEP,CN,ATM,CAZ,CIP |
|  | 7 | SXT,CTX,FEP,CN,TE,ATM,CAZ,CIP |
|  | 1 | SXT,CTX,FEP,MEM,TE,ATM,CAZ,CIP |
|  | 1 | AMC,SXT,CTX,FEP,CNTE,ATM,CIP |
| R9 | 8 | AMC,SXT,CTX,FEP,CN,TE,ATM,CAZ,CIP |
|  | 1 | AMC,CTX,FEP,IPM,CN,TE,ATM,CAZ,CIP |
|  | 2 | SXT,CTX,FEP,MEM,CN,TE,ATM,CAZ,CIP |

CTX- Cefotaxime, FEP- Cefepime, ATM- Aztreonam, CAZ- Ceftazidime, TE- Tetracycline, SXT- Sulfamethoxazole-Trimethoprim, CIP- Ciprofloxacin, AMC- Amoxicillin-clavulanic acid, CN- Gentamicin, MEM- Meropenem, IPM- Imipenem

Supplementary Table 3: Detailed household characteristics for least and most resistant

| Resistance Category | location | HH members below 18 | Sex of HH head | Age of HH Head | Education level HH head | Visitor in the last 24 hours | Negotiate on antibiotic dosage | Water source type | Cover drinking water | Husbandry practice |
| --- | --- | --- | --- | --- | --- | --- | --- | --- | --- | --- |
| Least | Rural | 2 | Female | 52 | Non | No | Yes (financial) | Open | Yes | Free range |
| Least | Rural | 2 | Female | 53 | Non | No | Yes (financial) | Open | Yes | Free range |
| Least | Rural | 2 | Female | 54 | Non | No | Yes (financial) | Open | Yes | Free range |
| Most | Rural | 1 | Female | 63 | Primary | Yes | No | Protected | No | Intensive |
| Most | Urban | 15 | Male | 47 | Tertiary+ | Yes | No | Protected | No | Intensive |
| Most | Rural | 3 | Female | 54 | Primary | Yes | No | Open | No | Intensive |
| Most | Rural | 3 | Female | 54 | Primary | Yes | No | Open | No | Intensive |
| Most | Rural | 7 | Female | 63 | Primary | No | No | Protected | No | Intensive |
| Most | Urban | 6 | Male | 57 | Secondary | No | No | Protected | Yes | Intensive |
| Most | Rural | 3 | Male | 29 | Primary | Yes | Yes (comfort) | Protected | No | Intensive |
| Most | Urban | 6 | Male | 57 | Secondary | No | No | Protected | Yes | Intensive |
| Most | Rural | 4 | Female | 57 | Primary | Yes | No | Protected | No | Intensive |
| Most | Urban | 10 | Male | 73 | Secondary | Yes | No | Protected | Yes | Intensive |
